1 **Functional analysis of KIT gene structural mutations causing porcine dominant white**  
2 **phenotype by using genome edited mouse models**

3

4 Guangjie Sun, Xinyu Liang, Ke Qin, Yufeng Qin, Xuan Shi, Peiqing Cong, Deling Mo,  
5 Xiaohong Liu, Yaosheng Chen\*, and Zuyong He\*

6

7 State Key Laboratory of Biocontrol, School of Life Sciences, Sun Yat-Sen University,  
8 Guangzhou 510006, China

9

10 \*Correspondence author

11 E-mail: [chyaosh@mail.sysu.edu.cn](mailto:chyaosh@mail.sysu.edu.cn) or [zuyonghe@foxmail.com](mailto:zuyonghe@foxmail.com)

12

13

14

15

16

17

18

19

20

21

22

## 23 **Abstract**

24 Dominant white phenotype in pigs is considered to be caused by two structural  
25 mutations in *KIT* gene, including a 450-kb duplication encompassing the entire *KIT*  
26 gene, and a splice mutation (G > A) at the first base in intron 17, which leads to the  
27 deletion of exon 17 in mature *KIT* mRNA, and the production of KIT protein lacking a  
28 critical catalytic domain of kinase. However, this speculation has not yet been validated  
29 by functional studies. Here, by using CRISPR/Cas9 technology, we created two mouse  
30 models mimicing the structural mutations of *KIT* gene in dominant white pigs,  
31 including the splice mutation mouse model *KIT*<sup>D17/+</sup> with exon 17 of one allele of *KIT*  
32 gene deleted, and duplication mutation mouse model *KIT*<sup>Dup/+</sup> with one allele of *KIT*  
33 gene coding sequence (CDS) duplicated. We found that each mutation individually can  
34 not cause dominant white phenotype. Splice mutation homozygote is lethal and  
35 heterozygous mice present piebald coat. Inconsistent with previous speculation, we  
36 found *KIT* gene duplication mutation did not confer the patched phenotype, and had no  
37 obvious impact on coat color. Interestingly, combination of these two mutations lead to  
38 dominant white phenotype. Further molecular analysis revealed that combination of  
39 these two structural mutations could inhibit the kinase activity of the KIT protein, thus  
40 reduce the phosphorylation level of PI3K and MAPK pathway associated proteins,  
41 which may be related to the observed impaired migration of melanoblasts during  
42 embryonic development, and eventually lead to dominant white phenotype. Our study  
43 provides a further insight into the underlying genetic mechanisms of porcine dominant  
44 white coat colour.

## 45 **Author summary**

46 KIT plays a critical role in control of coat colour in mammals. Two mutation  
47 coexistence in *KIT* are considered to be the cause of the *Dominant white* phenotype in  
48 pigs. One mutation is a 450-kb large duplication encompassing the entire *KIT* gene,  
49 another mutation is a splice mutation causing the skipping of *KIT* exon 17. The  
50 mechanism of these two mutations of *KIT* on coat color formation has not yet been  
51 validated. In this study, by using genome edited mouse models, we found each  
52 structural mutation individual does not lead dominant white phenotype, but  
53 combination of these two mutations could lead to a nearly complete white coat colour  
54 similar to pig dominant white phenotype, possibly due to the inhibition of the kinase  
55 activity of the *KIT* protein, thus its signalling function on PI3K and MAPK pathways,  
56 leading to impaired migration of melanoblasts during embryonic development, and  
57 eventually lead to dominant white phenotype. Our study provides a further insight into  
58 the underlying genetic mechanisms of porcine dominant white coat colour.

59

## 60 **Introduction**

61 Due to domestication and long term selection, dominant white is a widespread coat  
62 color among domestic pig breeds, such as Landrace and Large White [1]. The dominant  
63 white phenotype in domestic pigs is considered to be caused by two structural mutations  
64 in the *KIT* gene, (1) a ~450-kb tandem duplication that encompasses the entire *KIT* gene  
65 body and ~150 kb upstream region of *KIT* gene and (2) a splice mutation at the first  
66 nucleotide of intron 17 in one of the *KIT* copies that leads to the skipping of exon 17,

67 and the production of KIT protein lacking a critical region in kinase catalytic domain.

68 [2-6].

69

70 KIT is a class III tyrosine kinase receptor, encoded by the *KIT* gene. KIT receptor  
71 is expressed on several cell types, including mast cells, hematopoietic progenitors,  
72 melanoblasts and differentiated melanocytes [7]. The binding of its ligand - stem cell  
73 factor (SCF) causes KIT to homodimerize, leading to the activation of its intrinsic  
74 kinase activity through autophosphorylation of tyrosine residues. KIT has a number of  
75 potential tyrosine phosphorylation sites, which interact with multiple downstream  
76 signaling pathways, including the PI3K, MAPK, and Src family kinase pathways [7, 8].  
77 These pathways are involved in the regulation of cells growth, survival, migration and  
78 differentiation [9].

79

80 The 450-kb large duplication that encompasses the entire *KIT* gene body  
81 previously was speculated to confer the patch phenotype in pigs due to abnormal KIT  
82 expression [4]. Based on this, a hypothesis has been proposed that there is an  
83 evolutionary scenario whereby the duplication first occurred and resulted in a white-  
84 spotted phenotype that was selected by humans. The splice mutation occurred  
85 subsequently and resulted in a completely white phenotype, due to the skipping of exon  
86 17 in the mature transcript removes a crucial part of the tyrosine kinase domain, thus  
87 enhances the defect in *KIT* signaling functions [5], and disturbs the migration of  
88 melanocyte precursors, leading to dominant white coat colour [2]. This seems

89 reasonable, as normal migration and survival of neural crest-derived melanocyte  
90 precursors is dependent on KIT expression and the availability of its ligand [10]. Loss  
91 of function mutations in *KIT* gene could lead to white coat color in mouse, as  
92 documented in homozygous *KIT*<sup>K641E</sup> mouse [11] and KIT-deficient model *W<sup>v</sup>/W<sup>v</sup>*  
93 [12]. However, functional analysis of the structural mutations in KIT gene of dominant  
94 pigs still need to be carried out to confirm the hypothesis. Here, by using CRISPR/Cas9  
95 technology, we created mouse models mimicking the splice mutation and duplication  
96 mutation to investigate the underlying genetic mechanism of dominant white  
97 phenotype[13].

98

## 99 **Results**

### 100 **Splice mutation but not the duplication mutation of *KIT* gene leads to altered coat** 101 **color**

102 In pigs, the wild-type KIT allele is recessive and denoted as *i*. Previous studies  
103 considered that two different mutant KIT alleles semidominant *I<sup>P</sup>* allele and the  
104 dominant *I* allele confer the patch and dominant white phenotype, respectively (Fig.  
105 1A). *I* allele presents a 450-kb large duplication (two to three copies) that encompasses  
106 the entire *KIT* gene and at least one of the *KIT* copies carries a splice mutation (G>A at  
107 the first base in intron 17), causing exon skipping and the expression of a KIT protein  
108 lacking an essential part of the tyrosine kinase domain. *I<sup>P</sup>* allele involves the 450-kb  
109 duplication but not the splice mutation[6]. To investigate the effects of *KIT* gene  
110 structural mutations on coat color, we created three genome edited mouse models using

111 C57BL/6 strain. The C57BL/6 mice is dominant black and broadly used in coat color  
112 study [14].

113

114 To mimic the duplication mutation ( $I^P$  allele), we knocked in the CDS of KIT gene  
115 linked with the enhanced green fluorescent protein (EGFP) reporter via a self-cleaving  
116 2A peptide to facilitate subsequent identification (Fig. 1B). The heterologous of *KIT*  
117 duplication mouse model was denoted as *KIT<sup>Dup/+</sup>*. Western blot analysis results  
118 demonstrated that EGFP was extensively expressed in the skin of *KIT<sup>Dup/+</sup>* mice, as  
119 compared with the wild-type control *KIT<sup>+/+</sup>*, which implying the inserted *KIT* CDS was  
120 correctly expressed, as 2A peptide strategy allows the co-expression of KIT proteins  
121 and EGFP from the integrated single vector (Fig. 1D). We found duplication of *KIT*  
122 gene did not result in the patch phenotype, as no obvious difference was observed on  
123 coat color between *KIT<sup>Dup/+</sup>* and *KIT<sup>+/+</sup>* mice (Fig. 1C).

124

125 To mimic the splice mutation, we substitute the first nucleotide (G) of *KIT* gene  
126 intron 17 with A through CRISPR/Cas9 mediated homologous recombination (Fig. 1B).  
127 The heterologous of this splice mutation mouse model was denoted as *KIT<sup>GtoA/+</sup>*. An  
128 extensive screening of the offspring implies that homologous of splice mutation of *KIT*  
129 gene could be lethal, as no survived individual of *KIT<sup>GtoA/GtoA</sup>* has been identified. Big  
130 white spots appeared on the abdomen of *KIT<sup>GtoA/+</sup>* mice as compared with *KIT<sup>+/+</sup>* (S1  
131 Fig). To determine whether the G to A mutation at the first nucleotide of intron 17 of  
132 *KIT* gene can lead to the skipping of exon 17, RT-PCR was carried out by using the

133 RNA isolated from the skin of *KIT*<sup>GtoA/+</sup> mice. To our surprise, the results showed that  
134 exon 17 was not removed from the transcript mRNA, and a small percent of the  
135 transcript contained partial region of the intron 17, as determined by Sanger sequencing  
136 (Fig. 1F & G). As this model does not mimic the splice mutation well, we did not use  
137 it in the subsequent studies.

138

139 Therefore, in order to create a mouse model mimicking the skipping of exon 17,  
140 we have directly deleted the exon 17 in genomic by using paired sgRNA with one target  
141 the intron 16 and another one targets the intron 17 (Fig. 1B). The heterologous of this  
142 splice mutation mouse model was denoted as *KIT*<sup>D17/+</sup>. An extensive screening of the  
143 offspring implies that homologous of splice mutation of *KIT* gene could be lethal, as no  
144 survived individual of *KIT*<sup>D17/D17</sup> has been identified. In addition, IVF experiment by  
145 fertilization oocytes from *KIT*<sup>D17/+</sup> females with sperm from *KIT*<sup>D17/+</sup> males resulted  
146 in no survived individual of *KIT*<sup>D17/D17</sup> can be obtained (S1 Table). This confirms the  
147 previous speculation that *I<sup>L</sup>* allele (single copy of *KIT* gene with the splice mutation)  
148 could be lethal in pigs, as this allele was not found among worldwide pig population  
149 [6]. RT-PCR analysis of the skin tissue from *KIT*<sup>D17/+</sup> mice indicates that exon 17 is  
150 removed from the mature transcript (Fig. 1E), and this was confirmed by Sanger  
151 sequencing (Fig. 1G). Interestingly, compared with *KIT*<sup>+/+</sup>, *KIT*<sup>D17/+</sup> mice presented a  
152 piebald coat colour in head and trunk, a vertical white stripe on the forehead, a half loop  
153 of white hair on the shoulder blade area, and dominant white at entire abdominal part.  
154 (Fig. 1D & S1 Fig).

155

156 **Fig 1. Generation of three mouse models mimicking structural mutations of KIT**

157 **gene in dominant white pig.** (A) The schematic summary of *KIT* mutations causing

158 patch and dominant white phenotypes. of three coat phenotypes of pig. The patch coat

159 colour is associated with a 450-kb large duplication that encompasses the entire KIT

160 gene, and the dominant white is associated with two to three copies KIT gene

161 duplication and at least one of the KIT copies carries a splice mutation (G>A at the first

162 base in intron 17), causing exon skipping and the expression of a KIT protein lacking

163 an essential part of the tyrosine kinase domain. (B) To mimic the duplication mutation

164 of KIT gene in patched pigs, the last exon of KIT gene with stop codon TGA mutated

165 to GCC, linked with the CDS of KIT gene via a self-cleaving 2A peptide, followed by

166 the linking with the enhanced green fluorescent protein (EGFP) reporter via 2A peptide

167 was knocked in to the KIT locus through CRISPR/Cas9 mediated homologous

168 recombination. To mimic the splice mutation, two mouse models were established. One

169 has the first nucleotide (G) of KIT gene intron 17 substitute with A through

170 CRISPR/Cas9 mediated homologous recombination, and another one with the exon 17

171 deleted by using paired sgRNA with one target the intron 16 and another one targets

172 the intron 17. (C) Coat colour of the wild-type (*KIT*<sup>+/+</sup>), heterologous of KIT

173 duplication (*KIT*<sup>Dup/+</sup>) and splice mutation (*KIT*<sup>D17/+</sup>) mouse model. (D) Western

174 blotting analysis confirmed the presence of EGFP expression in the skin of *KIT*<sup>Dup/+</sup>

175 mice, implying the inserted *KIT* CDS can be correctly expressed. (E) RT-PCR analysis

176 of the deletion of exon 17 of *KIT* gene in *KIT*<sup>D17/+</sup> mice. The truncated PCR product is



177 indicated by arrow head. (F) RT-PCR analysis of the transcription product of *KIT* gene  
178 in *KIT<sup>GtoA/+</sup>* mice. PCR product with insertion is indicated by arrow head. (G) Sanger  
179 sequencing of cDNA from F indicates exon 17 of *KIT* gene in *KIT<sup>GtoA/+</sup>* mice is not  
180 removed, and a small percent of the transcript contained partial region of the intron 17.  
181 Sanger sequencing of cDNA from E indicates exon 17 is removed from the mature  
182 transcript in mature transcript in *KIT<sup>D17/+</sup>* mice.

183

184 **Splice mutation but not the duplication mutation of *KIT* gene significantly reduces**  
185 **melanin accumulation.**

186 Histological analysis (Fontana-Masson staining) of the back skin of 5-week old  
187 mice, revealed that similar to the *KIT<sup>+/+</sup>* control mice, the hair follicles of both *KIT*  
188 *Dup<sup>+/+</sup>* and *KIT<sup>D17/+</sup>* mice are long in length, and in the hair bulb, the dermal papilla is  
189 completely coated by matrix, the keratogenous zone region is clearly visible and is  
190 connected to hair shaft and dermal papilla, and fibrous tract is substantially invisible in  
191 the skin (Fig. 2). These results indicate that similar to the *KIT<sup>+/+</sup>* control mice, the hair  
192 follicles of 5-week-old *KIT<sup>Dup/+</sup>* and *KIT<sup>D17/+</sup>* mice are in the growing stage (anagen V  
193 or VI), which is advantageous for the observation of the hair follicle shape, and melanin  
194 distribution due to melanin synthesis is more active during this stage [15]. The results  
195 of hair follicle shape imply that both the splice mutation and duplication mutation did  
196 not impair the hair follicle development significantly.

197

198 No obvious difference was observed in the content of melanin contained in hair

199 follicles between *KIT*<sup>Dup/+</sup> and *KIT*<sup>+/+</sup> mice (Fig. 2). While almost no melanin is  
200 observed in the hair follicles within the white coat area, and the melanin level of hair  
201 follicles in the black coat area of *KIT*<sup>D17/+</sup> is significantly lower (indicated by yellow  
202 arrow head). Therefore, the *KIT* duplication mutation did not impair the melanin  
203 accumulation, whereas the splice mutation significantly impaired melanin  
204 accumulation in hair follicle.

205

206 **Fig 2. Histological analysis of the back skin of 5-week old *KIT*<sup>+/+</sup>, *KIT*<sup>D17/+</sup> and *KIT*  
207 *Dup*<sup>+</sup> mice.** Melanin is stained with Fontana-Masson, and indicated by arrow head. Scale  
208 bar = 50  $\mu$ M.

209

210 **The piebald coat colour of *KIT*<sup>D17/+</sup> mice is caused by the reduction of melanocytes.**

211 The reduction of melanin content in hair follicles may be due to reduced  
212 melanocytes, or reduced ability of melanocytes on melanin synthesis. To determine the  
213 piebald coat of *KIT*<sup>D17/+</sup> mice is caused by which factor, we used KIT protein as the  
214 marker to detect the distribution and amounts of melanocytes in the hair follicle of 5-  
215 week-old mice. Compared with the *KIT*<sup>+/+</sup> control mice, we found that the  
216 immunohistochemical staining of KIT decreased in the hair follicles of black coat area  
217 of *KIT*<sup>D17/+</sup> mice, while the staining decreased more significantly in the white coat  
218 region (Fig. 3A). This was confirmed by qPCR and Western blot analysis of the skin  
219 tissues (Fig. 3B and 3C). In theory, the deletion of exon 17 should not affect the  
220 expression level of *KIT* gene, thus the reduced *KIT* expression level in skin tissue should

221 be due to reduced melanocyte quantity. qPCR analysis of the isolated peritoneal cell  
222 derived mast cells indicated that deletion of the exon 17 did not affect the expression  
223 level of *KIT* gene (Fig. 3B & S2 Fig). The reduced expression of *KIT* gene together  
224 with another two marker genes (DCT and Melan A) of melanocytes in *KIT*<sup>D17/+</sup> mice  
225 (Fig. 3C) suggested that the splice mutation of *KIT* gene could lead to reduced number  
226 of melanocytes in mice hair follicles.

227

228 Unlike the *KIT*<sup>D17/+</sup> mice, the *KIT*<sup>Dup/+</sup> mice contained an additional copy of *KIT*  
229 CDS, which in theory could lead to increased expression of *KIT* gene. qPCR analysis  
230 of the isolated mast cells confirmed that the expression level of *KIT* gene was improved  
231 in *KIT*<sup>Dup/+</sup> mice as compared with the *KIT*<sup>+/+</sup> control mice (Fig. 3B). However, in  
232 mouse skin, the expression level of *KIT* in *KIT*<sup>Dup/+</sup> mice was not significantly different  
233 from the *KIT*<sup>+/+</sup> control mice as revealed by immunohistochemical and Western blot  
234 analysis (Fig. 3A & C). In addition, the expression level of melanocyte marker gene  
235 DCT was not affected, but another melanocyte marker gene MelanA was significantly  
236 improved in the skin of *KIT*<sup>Dup/+</sup> mice (Fig. 3C). These results suggested that the  
237 duplication mutation of *KIT* gene may not affect the number of melanocytes in the skin,  
238 but may affect melanin synthesis.

239

240 Interestingly, we observed that the distribution of melanocytes in hair bulb is  
241 broader in *KIT*<sup>D17/+</sup> mice as compared with the *KIT*<sup>+/+</sup> control mice. This phenomenon  
242 was more obvious in white coat area than in the black coat area (Fig. 3A). In addition,

243 we found the distribution of melanocytes in the hair bulb of *KIT*<sup>Dup/+</sup> mice was  
244 relatively broader than that in the *KIT*<sup>+/+</sup> control mice (Fig. 3A). Previous studies  
245 considered that only melanocytes that are close to the dermal papilla can secrete and  
246 provide melanin to the hair [16], we speculate the altered distribution of melanocyte in  
247 both *KIT* splice mutation and duplication mutation mice may have certain impact on  
248 melanin accumulation.

249

250 **Fig 3. KIT splice mutation causes the reduction of melanocytes.** (A) Expression of  
251 KIT protein in hair follicle of wild-type and mutant mice was determined by  
252 immunohistochemical staining. Melanin is stained with Fontana-Masson. Scale bar =  
253 50 μM. (B) Transcriptional level of *KIT* gene in mast cell and skin tissue of wild-type  
254 and mutant mice was determined by qPCR analysis. (C) Expression level of KIT, DCT,  
255 MelanA, AKT, ERK1/2 and phosphorylation level of KIT, AKT, ERK1/2 in skin tissue  
256 of wild-type and mutant mice was determined by Western blot analysis. (D) Statistical  
257 analysis of relative protein expression levels base on the intensity of bands in C. \*  
258 stands for  $p < 0.05$ .

259

260 **Splice mutation of *KIT* gene impairs the kinase activity of the KIT protein and**  
261 **affects embryonic melanoblast migration.**

262 Previous studies speculated that *KIT* mutations in dominant white pigs could  
263 disturb the migration of melanocyte precursors melanoblasts during the embryonic  
264 period [2]. In order to determine whether the splice mutation or the duplication mutation

265 of *KIT* gene impairs the migration of melanoblasts during embryonic period, we stained  
266 the *KIT* protein as a marker to detect the distribution of melanoblasts in the transverse  
267 section mice at E14.5. We found no obvious changes in the location of melanoblasts in  
268 *KIT*<sup>Dup/+</sup> compared to the *KIT*<sup>+/+</sup> control mice (S3 Fig). Though the distribution of  
269 melanoblasts in *KIT*<sup>D17/+</sup> near the neural tube is not different between in *KIT*<sup>D17/+</sup> and  
270 the *KIT*<sup>+/+</sup> mice, the number of melanoblasts in the dorsolateral migration pathway,  
271 near the forelimb and the abdomen epidermis is significantly reduced (Fig. 4A). This  
272 indicates that duplication mutation of *KIT* gene alone does not impair the migration  
273 of melanoblasts, in contrast, the splice mutation could significantly impair the  
274 migration of melanoblasts at embryonic stage, however, it does not completely block  
275 the migration process, a certain number of melanoblasts could migrate to the  
276 corresponding destination positions, and leads to the piebald phenotype.

277

278 We observed that, compared with the *KIT*<sup>+/+</sup> control mice, the colour of black hair  
279 of *KIT*<sup>D17/+</sup> mice became significantly lighter as the mice grew older. The determination  
280 of the blackness of mouse hair showed that the blackness of the black hair of *KIT*<sup>D17/+</sup>  
281 mice was comparable to that of *KIT*<sup>+/+</sup> mice at 2 W, however, the blackness of the black  
282 hair of *KIT*<sup>D17/+</sup> mice decreased dramatically at 14 W, and was close to that of white  
283 hair of the *KIT*<sup>D17/+</sup> mice (Fig. 4B). Interestingly, we found the blackness of the hair of  
284 *KIT*<sup>Dup/+</sup> mice was relatively lower than that of *KIT*<sup>+/+</sup> mice at 2 W, but became  
285 comparable to that of *KIT*<sup>+/+</sup> mice at 14 W (Fig. 4B). Thus, we speculate that the splice  
286 mutation of *KIT* gene may affect the renewal or melanin synthesis function of

287 melanocytes in mice, which in turn causes the blackness of hair to decrease rapidly with  
288 age. To examine whether the impaired melanoblast migration and melanocyte renewal  
289 is caused by altered kinase activity of the KIT protein receptor, Western blot analysis  
290 of the skin tissue was carried out. We found splice mutation significantly reduced the  
291 phosphorylation level of KIT protein (Fig. 3C & D), indicating this mutation could lead  
292 to impaired autophorylation ability of KIT protein. However, both the expression level  
293 and phosphorylation level of AKT, a key protein of the PI3K pathway, was not impaired  
294 by the splice mutation of *KIT* gene. Also, the expression of ERK1/2, key proteins of the  
295 MAPK pathway, was not affected by the splice mutation, but the phosphorylation level  
296 of ERK1/2 was slightly increased (Fig. 3C & D). This result looks confusing, therefore,  
297 we further analyzed the expression and phosphorylation levels of AKT and ERK1/2 in  
298 follicles by immunohistochemical (IHC) analysis. The amount of target protein was  
299 determined by using Combined Positive Score (CPS), which is the number of target  
300 protein staining cells divided by the total number of viable cells, multiplied by 100. The  
301 results revealed that the expression level of both AKT and ERK1/2 in hair follicles was  
302 not affected by the splice mutation of *KIT* gene (Fig. 4C), however, the phosphorylation  
303 levels of these proteins decreased significantly in the follicle of black coat region of  
304 *KIT*<sup>D17/+</sup> mice, and phosphorylated AKT and ERK1/2 barely can be detected in the  
305 follicle of white coat region of *KIT*<sup>D17/+</sup> mice (Fig. 4C). Western blot results indicate  
306 that the duplication mutation of *KIT* gene increased the phosphorylation level of KIT  
307 protein (Fig. 3C & D). This is probably due to the increased expression level of KIT  
308 protein. Similar to the splice mutation, the duplication mutation did not affect both the

309 expression level and phosphorylation level of AKT. It also did not affect the expression  
310 level of ERK1/2, but slightly increased the phosphorylation level of ERK1/2 (Fig. 3C  
311 & D). IHC analysis revealed that both the expression level and the phosphorylation  
312 levels of AKT and ERK1/2 in the follicle of *KIT<sup>Dup/+</sup>* mice was not significantly affected  
313 (Fig. 4C). As AKT and ERK1/2 are respectively involved in the PI3K and MAPK  
314 pathways, which are responsible for melanoblast migration and differentiation, and  
315 melanin synthesis in melanocyte, therefore, the impaired melanoblast migration and  
316 accelerated hair greying in *KIT<sup>D17/+</sup>* mice should be related to impaired function of KIT  
317 kinase caused by the splice mutation of *KIT* gene.

318

319 **Fig 4. *KIT* splice mutation affects embryonic melanoblast migration and melanin**  
320 **accumulation.** (A) KIT is used as marker to detect melanoblast migration in *KIT<sup>+/+</sup>*  
321 and *KIT<sup>D17/+</sup>* mice embryo (E14.5). Migrating melanoblasts were indicated by arrow  
322 heads. Scale bar = 500  $\mu$ M. (B) Observation of hair from 2-W and 14-W old wild-  
323 type and mutant mice under a stereo microscope (left panel). Scale bar = 200  $\mu$ M. The  
324 relative blackness of hair was quantified based on the intensity of image (right panel).  
325 \* stands for  $p < 0.05$ . (C) AKT and ERK 1/2 expression and phosphorylation level in  
326 hair follicle of wild-type and mutant mice is determined by immunochemical staining.  
327 Scale bar = 50  $\mu$ M.

328

329 **Combination of the splice mutation and duplication mutation of *KIT* gene caused**  
330 **severely impaired melanoblast migration during embryonic stage, and dominant**  
331 **white phenotype**

332 As the splice mutation and duplication mutation of *KIT* gene individually did not  
333 lead to dominant white phenotype, we are curious whether the combination of these  
334 two mutations (denoted as compound mutations) can lead to dominant white phenotype.  
335 Therefore, the *KIT*<sup>Dup/+</sup> male and the *KIT*<sup>D17/+</sup> female was crossed to produce the *KIT*  
336 <sup>Dup/D17</sup> offspring as determined by PCR analysis of the deleted exon 17 and integrated  
337 EGFP reporter (Fig. 5A). Interestingly, the *KIT*<sup>Dup/D17</sup> mice presented a coat colour  
338 resembling the porcine dominant white phenotype: except for few gray hairs appearing  
339 near the eyelids and hip, the whole body was covered with white hairs (Fig. 5B). With  
340 the increase of age, the gray hairs of the eyelids and hips of *KIT*<sup>Dup/D17</sup> mice gradually  
341 disappeared (S4 Fig). Through histological observation of the back skin of *KIT*<sup>Dup/D17</sup>  
342 mice, we found that melanin is hardly visible in the hair follicles (Fig. 5C). However,  
343 no apparent morphological difference of the follicle was observed between *KIT*<sup>Dup/D17</sup>  
344 mice and the *KIT*<sup>+/+</sup> control mice. The hair follicles of 5-week-old *KIT*<sup>Dup/D17</sup> mice  
345 showed a typical characteristics of the growing stage (anagen V or VI) (Fig. 5C). This  
346 indicates that the compound mutation did not affect the development of hair follicle,  
347 but severely impaired the accumulation of melanin in hair follicles.

348

349 We suspected that similar to *KIT*<sup>D17/+</sup> mice, the decreased melanin accumulation  
350 in the hair follicles of *KIT*<sup>Dup/D17</sup> mice may be caused by reduced number of



351 melanocytes in the hair follicles. qPCR analysis of the isolated mast cells from *KIT*  
352 *Dup/D17* mice showed that compound mutations lead to improved expression level of *KIT*  
353 gene (Fig. 5D), which was mainly due to integrated additional copy of *KIT* CDS. In  
354 contrast, the expression level of *KIT* gene decreased significantly in skin tissue of *KIT*  
355 *Dup/D17* mice as determined by qPCR analysis (Fig. 5D), this was further confirmed by  
356 Western blot analysis (Fig. 5E). The reduced expression of *KIT* gene together with  
357 another three marker genes (DCT, MelanA and S100) of melanocyte in skin tissue of  
358 *KIT<sup>Dup/D17</sup>* mice (Fig. 5E) suggested that compound mutations of *KIT* gene could lead  
359 to reduced number of melanocytes in mice hair follicles, which may contribute to the  
360 decreased melanin accumulation in the hair follicles of *KIT<sup>Dup/D17</sup>* mice.

361

362 IHC analysis of the skin tissue confirmed that the number of melanocytes in the  
363 hair follicles of *KIT<sup>Dup/D17</sup>* mice decreased significantly as compared with the *KIT<sup>+/+</sup>*  
364 control mice, with only a few layers of melanocytes in close proximity to the dermal  
365 papilla visible (Fig. 5C).

366

367 Few gray hairs presented in the whole white background of *KIT<sup>Dup/D17</sup>* mice at  
368 young age, and they disappear gradually as determined by the hair blackness analysis  
369 (Fig. 5G & S4 Fig). This implies that the compound mutations of *KIT* gene may affect  
370 the renewal of melanocytes in hair follicles.

371

372 To investigate the underlying molecular mechanism of the compound mutations

373 of *KIT* gene on coat colour changing, the kinase function of KIT protein was determined  
374 by Western blot analysis of the skin tissue of *KIT<sup>Dup/D17</sup>* mice. The results showed that  
375 the phosphorylation level of KIT in the skin of *KIT<sup>Dup/D17</sup>* mice is significantly lower  
376 than that of the *KIT<sup>+/+</sup>* control mice (Fig. 5E). Both the expression level and  
377 phosphorylation level of AKT, a key protein of the PI3K pathway, decreased  
378 significantly. Though the expression of ERK1/2, key proteins of the MAPK pathway,  
379 was not affected, but the phosphorylation level of ERK1/2 decreased dramatically (Fig.  
380 5E). These results indicate that the compound mutations of *KIT* gene substantially  
381 impaired the signaling function of KIT protein receptor on PI3K and MAPK pathways.  
382 However, to our surprise, further IHC analysis of the hair follicle showed that  
383 phosphorylation of AKT and ERK1/2 in *KIT<sup>Dup/D17</sup>* seems not affected by the compound  
384 mutations as determined by CPS (Fig. 5F). This may imply a complex interaction  
385 between the splice mutation and duplication mutation of the *KIT* gene.

386

387 The compound mutations of *KIT* gene impaired the signaling function of KIT  
388 protein, which in turn could affect melanoblast migration at embryonic stage. Therefore,  
389 IHC analysis of the distribution of melanoblasts in the transverse section of *KIT<sup>Dup/D17</sup>*  
390 mice at E14.5 by staining the marker protein KIT. The results showed that compared  
391 with the *KIT<sup>+/+</sup>* control mice, the number of melanblast in the embryo of *KIT<sup>Dup/D17</sup>*  
392 mice increased significantly in the neural tube, and the number of melanoblasts in the  
393 dorsolateral migration pathway, the forelimb epidermis and the abdomen epidermis  
394 decreased significantly (Fig. 5H). This result indicates that the compound mutations of

395 *KIT* gene severely blocked melanoblast migration at embryonic stage, leading to  
396 increased accumulation of melanoblasts in the neural tube of the *KIT*<sup>Dup/D17</sup> mice, and  
397 a coat colour resembling porcine dominant white phenotype.

398

399 **Fig 5. Combination of *KIT* duplication and splice mutation causes severely**  
400 **impaired *KIT* signaling function and melanoblast migration in embryonic stage.**

401 (A) Identification of *KIT*<sup>Dup/D17</sup> mice through PCR analysis. (B) Coat colour of *KIT*<sup>+/+</sup>  
402 and *KIT*<sup>Dup/D17</sup> mouse. (C) Histological analysis of melanin accumulation in hair  
403 follicle of *KIT*<sup>+/+</sup> and *KIT*<sup>Dup/D17</sup> mice by Masson Fontana staining, and presence of  
404 melanocytes in hair follicle by immunostaining of KIT. Scale bar = 50 μM. (D) KIT  
405 mRNA levels mast cell and skin of *KIT*<sup>+/+</sup> and *KIT*<sup>Dup/D17</sup> mice were determined by  
406 qPCR analysis. (E) Expression levels of KIT, DCT, MelanA, S100, AKT, ERK1/2 and  
407 phosphorylation levels of KIT, AKT, ERK1/2 in skin of *KIT*<sup>+/+</sup> and *KIT*<sup>Dup/D17</sup> mice  
408 skin were determined by Western blot analysis (left panel) and quantified base intensity  
409 of bands (right panel). \* stands for p < 0.05. (F) Expression and phosphorylation level  
410 of AKT and ERK 1/2 in hair follicle of *KIT*<sup>+/+</sup> and *KIT*<sup>Dup/D17</sup> mice was determined by  
411 immunohistochemical analysis. Scale bar = 50 μM. (G) Observation of hair from 2-W  
412 and 14-W old of *KIT*<sup>+/+</sup> and *KIT*<sup>Dup/D17</sup> mice under a stereo microscope (upper panel).  
413 Scale bar = 200 μM. The relative blackness of hair was quantified based on the intensity  
414 of image (lower panel). \* stands for p < 0.05. (H) KIT is used as marker to detect  
415 melanoblast migration in *KIT*<sup>+/+</sup> and *KIT*<sup>Dup/D17</sup> mice embryo (E14.5). Migrating  
416 melanoblasts were indicated by arrow heads. Scale bar = 500 μM.

417

## 418 **Discussion**

419 In our study, we created mice models by using CRISPR/Cas9 technology to mimic  
420 the structural mutations of *KIT* gene in dominant white pigs. We used *KIT*<sup>D17/+</sup> mice  
421 model to research the effect of coat colour on *KIT* exon 17 deletion and explored the  
422 impact mechanism of *KIT* duplication on coat colour by *KIT*<sup>Dup/+</sup> mice model. We  
423 found that the *KIT* duplication did not influence mouse coat colour but *KIT* exon 17  
424 deletion turns black hair of mouse into piebald colour. The experimental results prove  
425 that the *KIT* exon 17 deletion reduced the kinase function of KIT and impair its  
426 signaling transduction on PI3K and MAPK pathways, which are involved in  
427 melanoblast migration, leading to certain percent of melanoblast blocked in migration  
428 from dorsal to ventral region during embryo development, resulting in a piebald coat  
429 of the mouse. Interestingly, combination of these two mutations lead to dominant  
430 white phenotype. In mutation *KIT*<sup>Dup/D17</sup> mouse embryo, melanoblasts severe blocked  
431 in the neural tube that could not migration. Those make *KIT*<sup>Dup/D17</sup> mouse displaying  
432 *dominant white* phenotype (Fig 6).

433

434 **Fig 6. Schematic summary of the mechanism of KIT structural mutations on coat**  
435 **colour changing.** SCF ligand may induce the formation of KIT/KIT<sup>D17</sup> dimer in  
436 melanoblast of mouse with KIT splice mutation (*KIT*<sup>D17/+</sup> mouse), and reduced the  
437 kinase function of KIT and impair its signaling transduction on PI3K and MAPK  
438 pathways, which are involved in melanoblast migration, leading to certain percent of

439 melanoblast blocked in migration from dorsal to ventral region during embryo  
440 development, resulting in a piebald coat of the mouse. Improved expression of normal  
441 form of KIT protein in mouse with the combination of KIT splice mutation and  
442 duplication mutation (*KIT<sup>Dup/D17</sup>* mouse) may increase the chance of formation of  
443 KIT/KIT<sup>D17</sup> dimer upon the binding of SCF as compared with that in *KIT<sup>D17/+</sup>* mice.  
444 Given that the amount of SCF ligand is limited, more KIT/KIT<sup>D17</sup> dimer presented on  
445 the cell surface of melanoblast may significantly reduce its signaling functions, resulting  
446 in more severely impaired melanoblast migration, with most melanoblast remaining in  
447 the neural tube, and resulting in a completely white coat colour. DM: dermamyotome;  
448 NT: neural tube.

449

450       KIT plays key roles in driving the melanocyte migration from the neural crest  
451 along the dorsolateral pathway to colonize the final destination in the skin[17].  
452 Mutations at the *KIT* gene is associated with the Dominant White coat colour of several  
453 important commercial breeds, like Large White and Landrace. The Dominant White  
454 coat colour is determined by the duplication of about 450-kb region encompassing the  
455 entire *KIT* gene (copy number variation, CNV) and by the presence of a splice mutation  
456 in intron 17 in one of the duplicated copies, that causes the skipping of exon 17[3]. *KIT*  
457 allele with two normal *KIT* copies has been considered to cause the presence of  
458 pigmented regions (patches) in white pigs[3]. In addition, a hypothesis has been  
459 proposed that the *KIT* allele carries a single copy of a mutated *KIT* gene (with splice  
460 mutation) that should be lethal if homozygous [3, 18]. These perspectives have not yet

461 been validated by functional studies in the past decades. Our functional study confirmed  
462 that homozygous of the splice mutation in *KIT* gene is lethal, as *KIT*<sup>D17/D17</sup> mouse could  
463 not be obtained. However, whether the lethal is due to anemia in embryonic stage as  
464 previously found in *KIT* defect mouse model need to be further validated. We also  
465 found that duplication of the *KIT* gene may not contribute to the patch phenotype found  
466 in pigs, as both *KIT*<sup>Dup/+</sup> and *KIT*<sup>Dup/Dup</sup> mice did not present the patch coat like that on  
467 Pietrain pig, but a coat colour basically indistinguishable from the *KIT*<sup>+/+</sup> control mice  
468 (Fig.1C & S1 Fig). Previous study has proposed that increased KIT expression from  
469 pig *I<sup>P</sup>* may affect ligand availability, which in turn disturbs the migration of melanocyte  
470 precursors, resulting in the patch phenotype [2]. This dosage effect may not be true, as  
471 our results showed that increased expression level of KIT protein from additional copy  
472 of *KIT* gene (*KIT* CDS in our mouse model) seems to have minimal effect on signaling  
473 function of KIT protein receptor on PI3K and MAPK pathways (Fig. 3A & 3C), and  
474 thus no obvious effect on melanoblast migration, melanocyte and follicle development,  
475 and melanin synthesis. In different to KIT duplication presented in *I<sup>P</sup>* allele in the pig,  
476 in our KIT duplication mouse model, only *KIT* CDS was inserted, the large fragment  
477 of regulatory regions was not included. The duplicated copy in *I<sup>P</sup>* allele may lack some  
478 regulatory elements located more than 150 kb upstream of *KIT* gene body[4], this  
479 regulatory mutation may lead to dysregulated expression of one or both copies of KIT,  
480 and thus contribute to the patch phenotype. Mutations in other genes responsible for  
481 pigmentation in pigs may be associated with the patch phenotype could not be ruled  
482 out.

483

484       The exon 17 of *KIT* gene encodes the 790-831 amino acids of KIT protein receptor,  
485 a highly conserved region of tyrosine kinase domain, which contains Tyr 823 residue  
486 that that is conserved in almost all tyrosine kinases, which is phosphorylated during  
487 KIT activation and is thought to act to stabilize the stability of KIT tyrosine kinase  
488 activity [8]. The splice mutation leading to the lacking of this region is previous  
489 considered to be responsible for the impaired KIT signal transduction, and thus the  
490 severe defect in the migration and survival of melanocyte precursors. Our IHC analysis  
491 of the skin tissue confirmed that the splice mutation can impair KIT signal transduction  
492 on PI3K and MAPK pathways (Fig. 4C). PI3K pathway regulates cell growth,  
493 proliferation, differentiation and survival [24], and MAPK regulates cell proliferation  
494 and apoptosis [25]. In addition, the MAPK pathway is also responsible for  
495 phosphorylating and activating MITF, which in turn activates the transcription of  
496 mRNAs of several important proteins involved in melanin synthesis, such as Tyrosinase,  
497 TRP and TRP2 [19]. The impaired melanoblast migration during embryonic stage (Fig.  
498 4A), and reduced number of melanocyte and melanin accumulation in hair follicle (Fig.  
499 3A) in *KIT*<sup>D17/+</sup> mice, could be attributed to the impaired PI3K and MAPK signaling  
500 induced by the splice mutation.

501

502       Previous study proposed an evolutionary scenario whereby *KIT* duplication  
503 occurred first and resulted in a white-spotted phenotype, and the splice mutation  
504 occurred subsequently and resulted in a completely white phenotype. The presence of

505 one normal *KIT* copy in *I* ensures that white pigs have a sufficient amount of KIT  
506 signaling to avoid severe pleiotropic effects on hematopoiesis and germ-cell  
507 development [5]. Thus the *KIT* duplication mutation seems to exhibit a rescue function  
508 to the splice mutation. Therefore, at first, we expected that the *KIT* duplication could  
509 restore the splice mutation in *KIT<sup>Dup/D17</sup>* mice. However, combination of these two  
510 mutations lead to more severely impaired signaling on PI3K and MAPK pathways  
511 (Fig.5E & 5F), melanblast migration (Fig. 5H), melanocyte number reduction and  
512 melanin accumulation (Fig.5 H), resulting in nearly completely white coat colour (Fig.  
513 5B). Thus the *KIT* duplication mutation does not seem to play a rescue role to the  
514 splice mutation. The underlying mechanism of the interaction between these two  
515 mutations could be very complicated. As the activation of intrinsic kinase activity of  
516 KIT receptor depends on the binding of SCF ligand to form homodimer. Thus we  
517 speculated that improved expression of normal form of KIT protein in *KIT<sup>Dup/D17</sup>* mice  
518 may increase the chance of formation of KIT/KIT<sup>D17</sup> dimer upon the binding of SCF  
519 as compared with that in *KIT<sup>D17/+</sup>* mice. Given that the amount of SCF ligand is limited,  
520 more KIT/KIT<sup>D17</sup> dimer presented on the cell surface of melanoblast may significantly  
521 reduce the activation of subsequent PI3K and MAPK signaling pathways, resulting in  
522 more severely impaired melanoblast migration, and a more pronounced phenotype  
523 change in coat colour (Fig. 6).

524

525 Through observation of the light and electron micrograph of a section of skin, a  
526 previous study concluded that melanocytes and their precursors were absent in the hair bulb



527 of the dominant white (*I*) pigs, and the dominant white color in the pig is due to a defect  
528 in the development of melanocytes [20]. However, we found that the combination of  
529 *KIT* duplication mutation and splice mutation did not completely block the melanoblast  
530 migration (Fig. 5H), and few melanocytes or their precursors can be detected in the skin  
531 hair follicles of *KIT*<sup>Dup/D17</sup> mice through immunostaining of marker protein of  
532 melanocytes (Fig. 5C). This was confirmed by q-PCR and Western blot analysis of  
533 additional melanocytes marker proteins in the skin of *KIT*<sup>Dup/D17</sup> mice (Fig. 5D). In  
534 addition, in our unpublished experiments, expression of several melanocyte marker  
535 proteins was detected by q-PCR and Western blot in skin tissue of Large White pigs,  
536 implying the exist of melanocyte or its precursors in dominant white pigs. These results  
537 indicate that the combination of *KIT* duplication mutation and splice mutation although  
538 impair the development of melanocyte severely, but still few melanocyte precursors  
539 can migrate to destination.

540

541 In conclusion, our study provides a further insight into the underlying genetic  
542 mechanisms of porcine dominant white coat colour.

543

## 544 **Materials and Methods**

### 545 **Establishment of mouse models**

546 All mouse models are established on the C57BL/6 background by Model Animal  
547 Research Center of Nanjing University (China) as described in previous report [21],  
548 with minor modifications. Briefly, C57BL/6 mice were kept under a 12/12 h light/dark

549 cycle. To produce zygotes for pronuclear injection, female mice were injected with 5  
550 IU pregnant mare's serum gonadotropin (PMSG), and 46–48 h later injected with 5 IU  
551 hCG to induce ovulation 10–12 h later. Following the hCG injection, put the females  
552 together with male mice in single cages overnight. Fertilized oocytes were isolated from  
553 the oviducts for pronuclear injection. To generate *KIT<sup>Dup/+</sup>* and *KIT<sup>GtoA/+</sup>* mouse model,  
554 Cas9 mRNA, sgRNA and the according donor plasmid (Fig. 1B) were injected into the  
555 pronuclei of zygotes. To generate *KIT<sup>D17/+</sup>* mouse model, Cas9 mRNA and a pair of  
556 sgRNA (Fig. 1B) were injected. All sgRNA sequences are listed in S2 table. Injected  
557 zygotes were transferred into the oviducts of surrogate recipient female mice to deliver  
558 genome-edited pups. *KIT<sup>Dup/D17</sup>* mice were obtained by mating *KIT<sup>D17/+</sup>* females with  
559 *KIT<sup>Dup/+</sup>* males because *KIT<sup>D17/+</sup>* males are infertile.

560

561 All procedures were performed in strict accordance with the recommendations of  
562 the Guide for the Care and Use of Laboratory Animals of the National Institutes of  
563 Health. The protocol was approved by the Institutional Animal Care and Use  
564 Committee (IACUC), Sun Yat-sen University (Approval Number: IACUC-DD-16-  
565 0901).

566

### 567 **Mouse genotyping**

568 Mice genotypes are identified by PCR. The tail of 1 week old mice are cut off to  
569 extract DNA by using a tissue DNA extraction kit (OMEGA). Primers used in PCR are  
570 summarized in S2 table.

571

572 Mice skin RNAs were prepared using TRIzol (Invitrogen) extraction followed by  
573 DNase (Ambion) treatment, and reverse transcription was carried out using the  
574 instructions of Reverse Transcription System (Promega).

575

576 Primers for mouse genotype identification please refer to S2 table. Polymerase  
577 chain reaction (PCR) was carried out using the GeneStar™ PCR Mix system. Each PCR  
578 reaction mix contained 1× GeneStar™ PCR Mix buffer, 1.0μM of each primer and  
579 about 100 ng DNA template. The procedure in the thermal cycling was an initial 5 min  
580 hold at 95 °C, followed by 35 cycles of 30 sec at 95°C, 30 sec at 60°C, and 30 sec at  
581 72°C, and finishing with 10 min incubation at 72°C.

582

583 In order to determine the mutant sequences, the PCR products were recovered by  
584 OMEGA DNA Gel Recovery Kit, cloned into pMD-18T vector (TAKARA) and  
585 transformed into DH5α competent cells. Plasmids then were purified from *E. coli* cells  
586 for Sanger sequencing.

587

### 588 **Isolation and culture of peritoneal cell derived mast cells**

589 Isolation and culture of peritoneal cell derived mast cells was performed as  
590 previous described protocol [22] with minor modifications. 5 ml of PBS and 2 ml of air  
591 was injected into peritoneal cavity of 14 weeks old mice. Then injected mice were  
592 carefully shaken in the palm for 5 mins. Subsequently, the cell-containing fluid of the

593 peritoneal cavity is gently collected in a plastic Pasteur pipette. After centrifugation,  
594 cells were resuspended, and cultured in DMEM medium supplemented with serum,  
595 cytokines IL-3 (CP39; novoprotein) and SCF (C775; novoprotein). After 10 days  
596 culture, CD117 and FceR1 makers were used to determine whether cultured cells are  
597 mast cell by flow cytometry analysis using the Beckman Coulter Gallios™ Flow  
598 Cytometer. For surface staining, cells were stained with APC anti-Mouse CD117 (17-  
599 1171; affymetrix) and FITC anti-mouse Fc epsilon receptor I alpha (FceR1) (11-5898;  
600 affymetrix) at room temperature for 30 minutes, then washed with PBS and then re-  
601 suspended in PBS.

602

### 603 **Histological and immunohistochemical analysis of tissue sections**

604 Skin tissues and embryos were fixed overnight in 10% (w/v) paraformaldehyde  
605 with 0.02 MPBS (pH 7.2) at 4 °C, processed and mounted in paraffin, then serially cut  
606 into 5µm-thick sections by Rotary Microtome (MICROM). Histological sections were  
607 stained with hematoxylin and eosin (H&E), observed and photographed under a  
608 fluorescent microscopy (Zeiss). For immunohistochemistry experiments, sections were  
609 treated with 3% H<sub>2</sub>O<sub>2</sub> to quench endogenous peroxidase activity, then treated with 5%  
610 bovine serum albumin to block nonspecific protein binding sites. Sections were  
611 incubated with primary antibody at 4 °C overnight, and then stained by using anti-  
612 Rabbit HRP-DAB Cell and tissue staining kit (R&D, CTS005). Detection was followed  
613 by TSA plus Flourescein (Perkinelmer, NEL741001KT). All antibodies including KIT  
614 (ab47587; abcam), Phospho-KIT (Try719) (#3391; Cell Signaling), Green Fluorescent

615 Protein (AB3080P; merk), DCT (ab74073; abcam), Erk1/2 (#4695; Cell Signaling),  
616 Akt (#9272; Cell Signaling) Phospho-Akt (#4060; Cell Signaling) and Phospho-  
617 Erk1/2 (#8544; Cell Signaling) were diluting in 1:200 with PBS.

618

### 619 **qPCR**

620 For all gene expression level detection, total RNAs were prepared using TRIzol  
621 (Invitrogen) extraction followed by DNase (Ambion) treatment, and reverse  
622 transcription was carried out following the instructions of Reverse Transcription  
623 System (Promega). The resulting total cDNAs were analyzed quantitatively using  
624 FastStart Universal SYBR Green Master kit (Roche) with primers for *KIT*, *ERK*, *AKT*,  
625 *PLCG* and *DCT*. Expression profiles were tested in triplicate on at least two mice on an  
626 LC480 instrument (Roche). Data were analyzed using the comparative Ct ( $\Delta\Delta Ct$ )  
627 method and one-tail, unpaired student T test (significance cutoff  $p < 0.01$ ). Gene  
628 expression levels were normalized to the housekeeping gene glyceraldehyde 3-  
629 phosphate dehydrogenase (GAPDH).

630

### 631 **Western blot analysis**

632 Proteins were extracted using Lysis Buffer (Key GEN), and proteins concentration  
633 was determined by using Pierce™ BCA Protein Assay Kit (Thermo). 300 ng protein  
634 was subjected to 10% SDS gel and electrotransferred onto PVDF membrane (Roche).  
635 After blocking for 1h with 3% BSA in PBS, the membrane was incubated with primary  
636 antibodies at 4 °C overnight.

637

638       The rabbit anti-KIT antibody (ab47587; abcam), rabbit anti-Phospho-KIT (Try719)  
639 antibody (#3391; Cell Signaling), rabbit anti-Green Fluorescent Protein antibody  
640 (AB3080P; merk), rabbit anti-DCT antibody (ab74073; abcam), rabbit anti-Erk1/2  
641 antibody (#4695; Cell Signaling) and rabbit anti-Akt antibody (#9272; Cell Signaling)  
642 were diluting in 1:1000, rabbit anti-Phospho-Akt antibody (#4060; Cell Signaling) and  
643 rabbit anti-Phospho-Erk1/2 antibody (#8544; Cell Signaling) were diluting in 1:2000,  
644 rabbit anti-GAPDH antibody (AP0063; biogot) was diluting in 1:5000 with PBS.  
645 Following by 10 min three times washing with TBST, the membrane was then  
646 incubated with 1:5000 goat anti-rabbit secondary antibodies (Abcam, ab6721) for 1h at  
647 room temperature. Protein bands were visualised using Kodak image station  
648 4000MM/Pro (Kodak), according to the manufacturer's instructions, and exposed to  
649 FD bio-Dura ECL (FD, FD8020). Protein levels were standardized by comparison with  
650 GAPDH.

651

## 652 **Statistical analysis**

653       All data were analyzed by using EXCEL (version 2016). The data were expressed  
654 as the means  $\pm$  SEM. Only values with  $p < 0.05$  were accepted as significance.

655

656 **Acknowledgement:** This work was jointly supported by National Transgenic Major  
657 Program (2016ZX08006003-006), National Key R&D Program of China  
658 (2018YFD0501200), and Key R&D Program of Guangdong Province

659 (2018B020203003).

660

## 661 **References**

- 662 1. Wiseman J. A history of the British pig: Duckworth; 1986.
- 663 2. Marklund S, Kijas J, Rodriguez-Martinez H, Rönnstrand L, Funa K, Moller M, et al. Molecular  
664 basis for the dominant white phenotype in the domestic pig. *Genome research*. 1998;8(8):826-33.
- 665 3. Pielberg G, Olsson C, Syvänen A-C, Andersson L. Unexpectedly high allelic diversity at the KIT  
666 locus causing dominant white color in the domestic pig. *Genetics*. 2002;160(1):305-11.
- 667 4. Giuffra E, Törnsten A, Marklund S, Bongcam-Rudloff E, Chardon P, Kijas JM, et al. A large  
668 duplication associated with dominant white color in pigs originated by homologous recombination  
669 between LINE elements flanking KIT. *Mammalian Genome*. 2002;13(10):569-77.
- 670 5. Andersson L, editor *Studying phenotypic evolution in domestic animals: a walk in the footsteps of*  
671 *Charles Darwin*. Cold Spring Harbor symposia on quantitative biology; 2010: Cold Spring Harbor  
672 Laboratory Press.
- 673 6. Rubin C-J, Megens H-J, Barrio AM, Maqbool K, Sayyab S, Schwochow D, et al. Strong signatures  
674 of selection in the domestic pig genome. *Proceedings of the National Academy of Sciences*.  
675 2012;109(48):19529-36.
- 676 7. Lennartsson J, Rönnstrand L. Stem cell factor receptor/c-Kit: from basic science to clinical  
677 implications. *Physiological reviews*. 2012;92(4):1619-49.
- 678 8. Roskoski R. Structure and regulation of Kit protein-tyrosine kinase—the stem cell factor receptor.  
679 *Biochemical and biophysical research communications*. 2005;338(3):1307-15.
- 680 9. Imokawa G. Autocrine and paracrine regulation of melanocytes in human skin and in pigmentary

- 681 disorders. *Pigment cell research*. 2004;17(2):96-110.
- 682 10. Wehrle - Haller B, Weston JA. Receptor tyrosine kinase - dependent neural crest migration in  
683 response to differentially localized growth factors. *BioEssays*. 1997;19(4):337-45.
- 684 11. Rubin BP, Antonescu CR, Scott-Browne JP, Comstock ML, Gu Y, Tanas MR, et al. A knock-in  
685 mouse model of gastrointestinal stromal tumor harboring kit K641E. *Cancer research*. 2005;65(15):6631-  
686 9.
- 687 12. Moniruzzaman M, Sakamaki K, Akazawa Y, Miyano T. Oocyte growth and follicular development  
688 in KIT-deficient Fas-knockout mice. *Reproduction*. 2007;133(1):117-25. doi: 10.1530/REP-06-0161.  
689 PubMed PMID: 17244738.
- 690 13. Bernex F, De Sepulveda P, Kress C, Elbaz C, Delouis C, Panthier J-J. Spatial and temporal patterns  
691 of c-kit-expressing cells in *WlacZ/+* and *WlacZ/WlacZ* mouse embryos. *Development*.  
692 1996;122(10):3023-33.
- 693 14. Slominski A, Paus R, Plonka P, Chakraborty A, Maurer M, Pruski D, et al. Melanogenesis during  
694 the anagen-catagen-telogen transformation of the murine hair cycle. *Journal of investigative dermatology*.  
695 1994;102(6):862-9.
- 696 15. Hou C, Miao Y, Wang X, Chen C, Lin B, Hu Z. Expression of matrix metalloproteinases and tissue  
697 inhibitor of matrix metalloproteinases in the hair cycle. *Experimental and therapeutic medicine*.  
698 2016;12(1):231-7.
- 699 16. Botchkareva NV, Botchkarev VA, Gilchrist BA. Fate of melanocytes during development of the  
700 hair follicle pigmentary unit. *The journal of investigative dermatology Symposium proceedings*.  
701 2003;8(1):76-9. doi: 10.1046/j.1523-1747.2003.12176.x. PubMed PMID: 12894999.
- 702 17. Besmer P, Manova K, Duttlinger R, Huang EJ, Packer A, Gyssler C, et al. The kit-ligand (steel



703 factor) and its receptor c-kit/W: pleiotropic roles in gametogenesis and melanogenesis. Dev Suppl.

704 1993;125-37. PubMed PMID: 7519481.

705 18. Johansson A, Pielberg G, Andersson L, Edfors-Lilja I. Polymorphism at the porcine Dominant

706 white/KIT locus influence coat colour and peripheral blood cell measures. Animal genetics.

707 2005;36(4):288-96. doi: 10.1111/j.1365-2052.2005.01320.x. PubMed PMID: 16026338.

708 19. Lin JY, Fisher DE. Melanocyte biology and skin pigmentation. Nature. 2007;445(7130):843.

709 20. Moller MJ, Chaudhary R, Hellmen E, Höyheim B, Chowdhary B, Andersson L. Pigs with the

710 dominant white coat color phenotype carry a duplication of the KIT gene encoding the mast/stem cell

711 growth factor receptor. Mammalian Genome. 1996;7(11):822-30.

712 21. Tao FF, Yang YF, Wang H, Sun XJ, Luo J, Zhu X, et al. Th1-type epitopes-based cocktail PDDV

713 attenuates hepatic fibrosis in C57BL/6 mice with chronic Schistosoma japonicum infection. Vaccine.

714 2009;27(31):4110-7. doi: 10.1016/j.vaccine.2009.04.073. PubMed PMID: 19410625.

715 22. Meurer SK, Ness M, Weiskirchen S, Kim P, Tag CG, Kauffmann M, et al. Isolation of Mature

716 (Peritoneum-Derived) Mast Cells and Immature (Bone Marrow-Derived) Mast Cell Precursors from

717 Mice. PLoS One. 2016;11(6):e0158104. doi: 10.1371/journal.pone.0158104. PubMed PMID: 27337047;

718 PubMed Central PMCID: PMC4918956.

719

## 720 **Supporting information**

721 **S1 Fig. *KIT*<sup>GtoA/+</sup>, *KIT*<sup>D17/+</sup> and *KIT*<sup>Dup/Dup</sup> mice phenotype.** (A) White spots appeared

722 on the abdomen of *KIT*<sup>GtoA/+</sup> mice as compared with *KIT*<sup>+/+</sup>. *KIT*<sup>D17/+</sup> mice presented

723 a piebald coat colour in head and trunk, a vertical white stripe on the forehead, a half

724 loop of white hair on the shoulder blade area, and dominant white at entire abdominal

725 region. There was no difference between the coat colour of  $KIT^{+/+}$  and  $KIT^{Dup/Dup}$  mice  
726 at 14 W old. (B) Schematic diagram of primers designed for identification of  $KIT^{D17/+}$   
727 and  $KIT^{Dup/Dup}$  mice identification. (C) PCR identification of the  $KIT^{D17/+}$  and  $KIT$   
728  $Dup/Dup$  mice.

729

730 **S2 Fig. Identification of mouse peritoneal mast cells through flow cytometry**  
731 **analysis.** KIT (stained by anti-Mouse CD117 APC) and FcεRI (stained by anti-mouse  
732 Fc epsilon receptor I alpha) were used as markers of mast cell.

733

734 **S3 Fig. Using KIT as marker to detect melanoblast migration in  $KIT^{+/+}$  and  $KIT$**   
735  **$Dup^{/+}$  mice embryo.** KIT is used as marker to detect melanoblast migration in  $KIT^{+/+}$   
736 and  $KIT^{Dup^{/+}}$  mice embryo (E14.5).

737

738 **S4 Fig. Coat colour changing of  $KIT^{Dup/D17}$  mice during growth up.** With the  
739 increase of age, the gray hairs of the eyelids and hips gradually disappeared.

740

741 **S1 Table. Homologous of splice mutation of KIT gene could be lethal.** Oocytes from  
742 superovulated  $KIT^{D17/+}$  females were *in vitro* fertilized with sperms collected from 5  
743  $KIT^{D17/+}$  males, and transferred to 10 surrogate females to generate offspring. No  $KIT$   
744  $D17/D17$  pups were born but 13  $KIT^{+/+}$  and 24  $KIT^{D17/+}$  pups were obtained.

745

746 **S2 Table. Oligos and primers used in this study.**



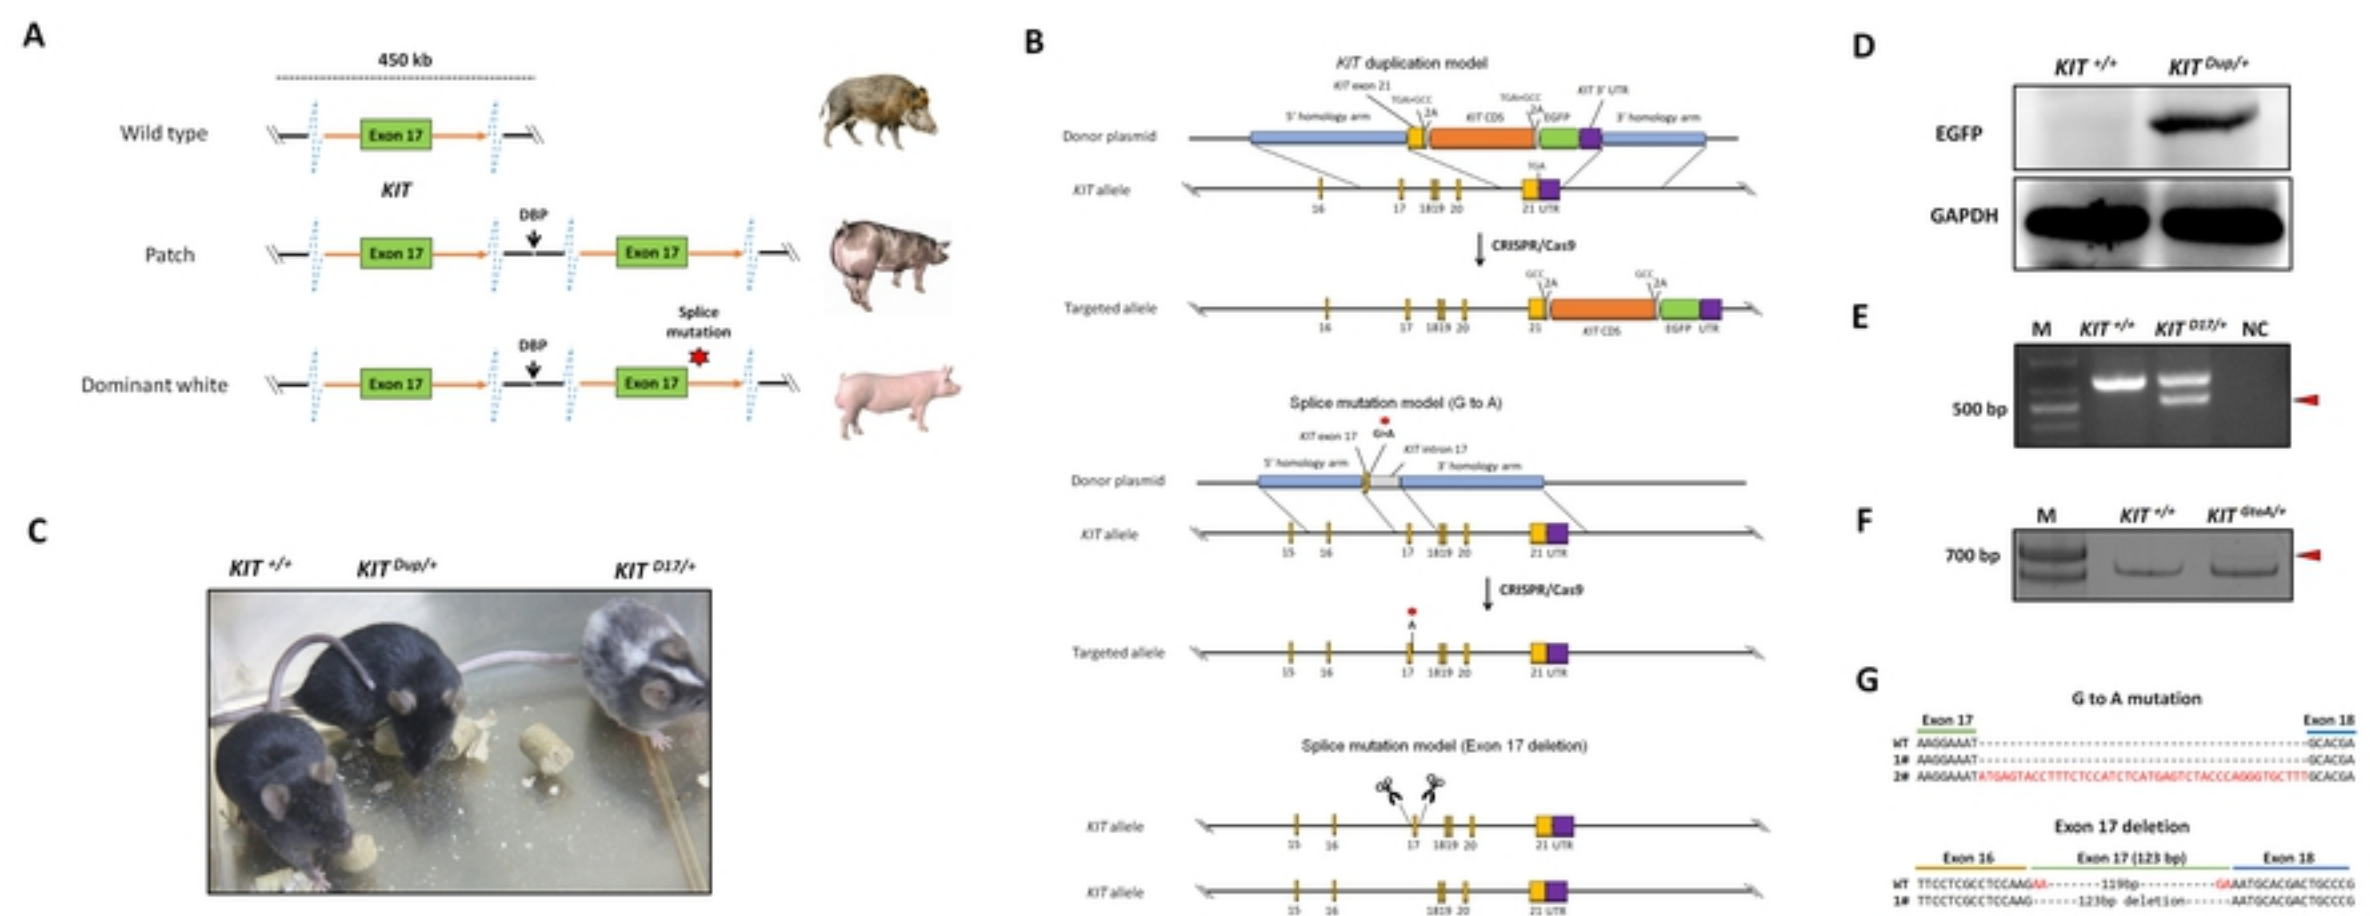

Figure 1

*KIT*<sup>+/+</sup>

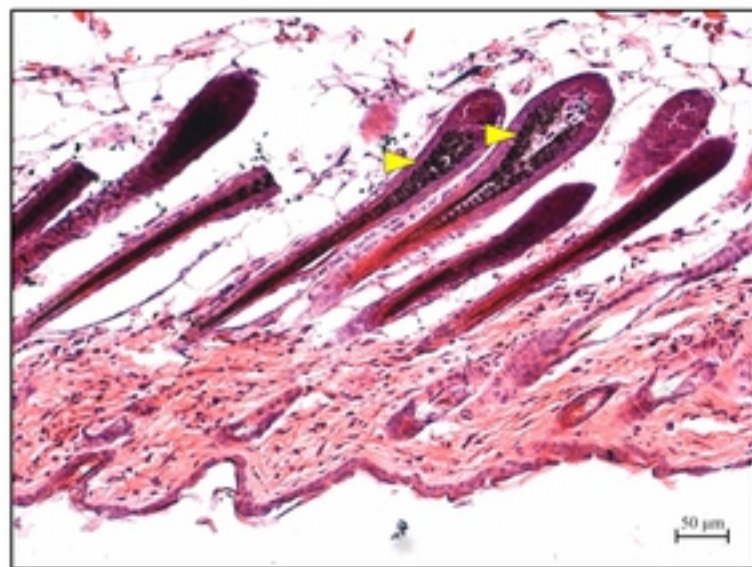

*KIT*<sup>D17/+</sup>

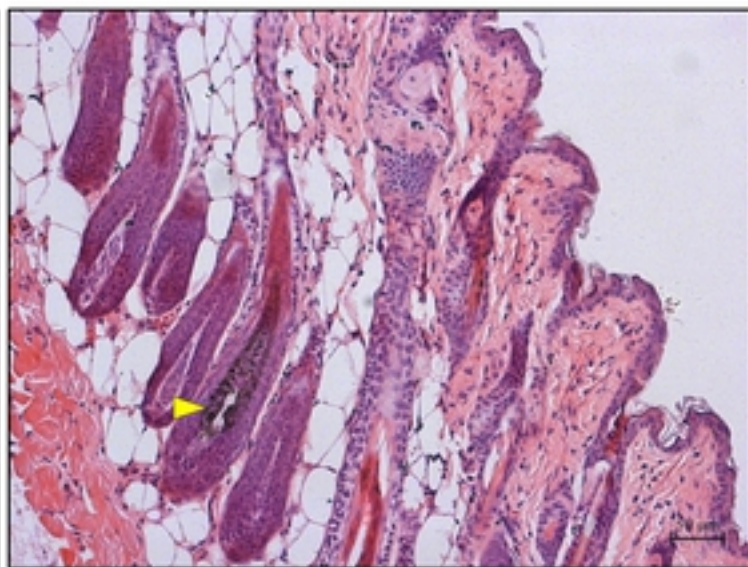

*KIT*<sup>Dup/+</sup>

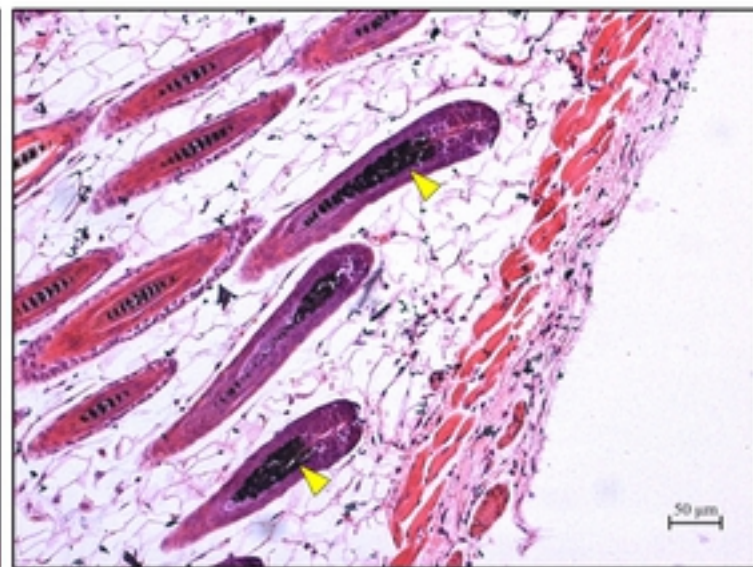

Figure 2

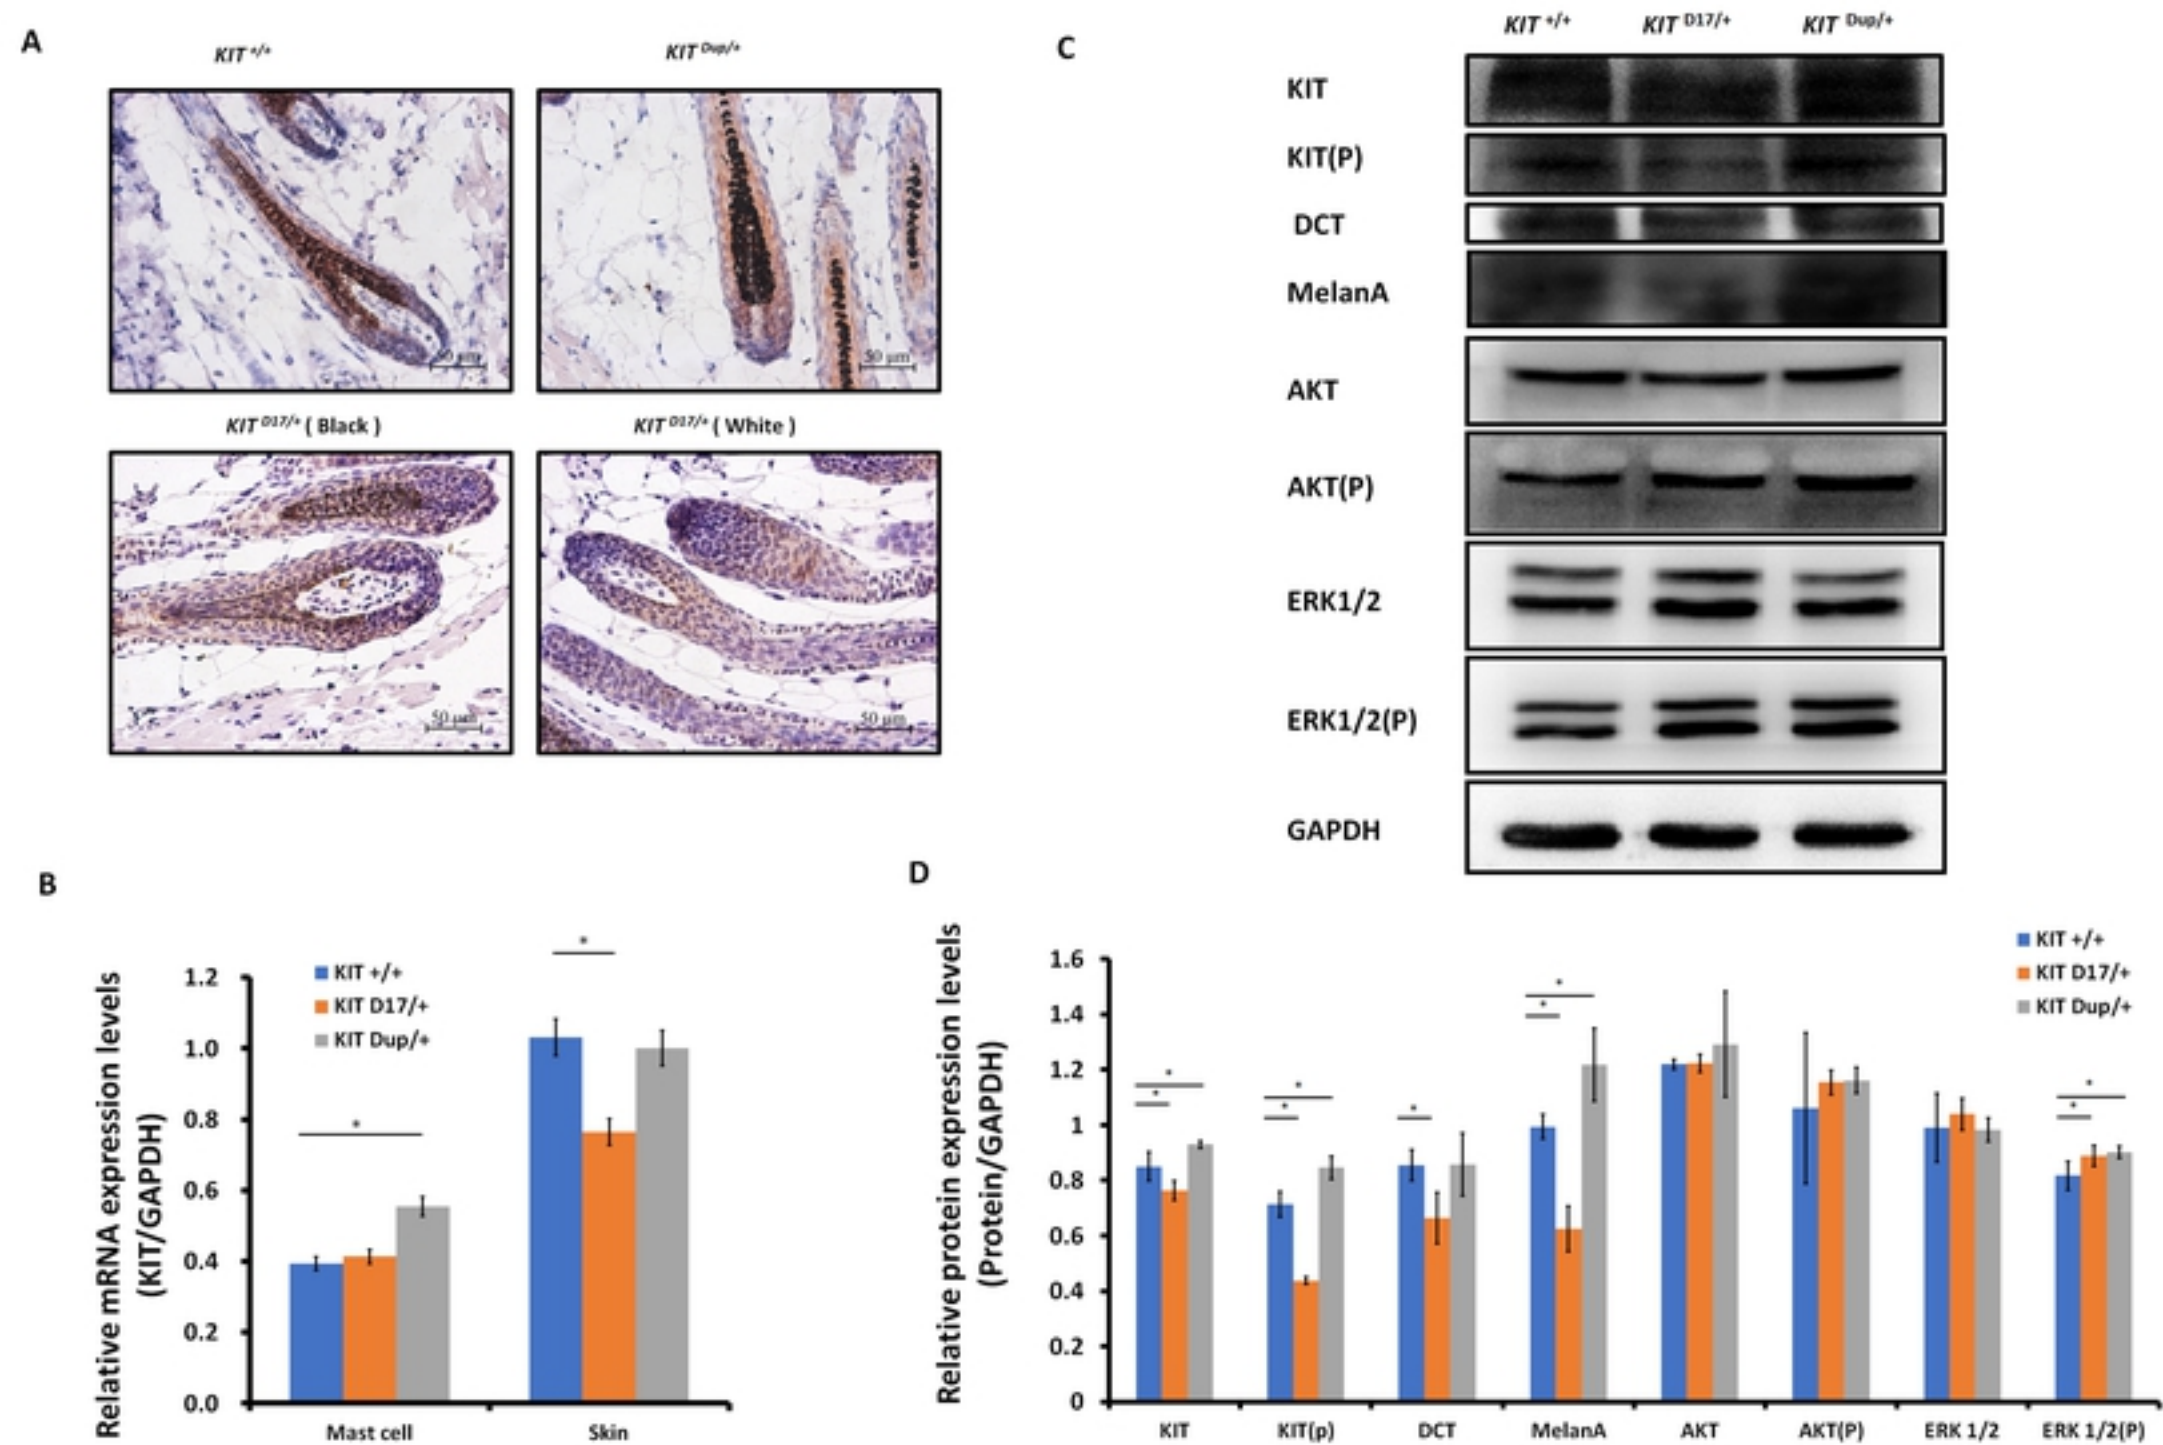

Figure 3

A

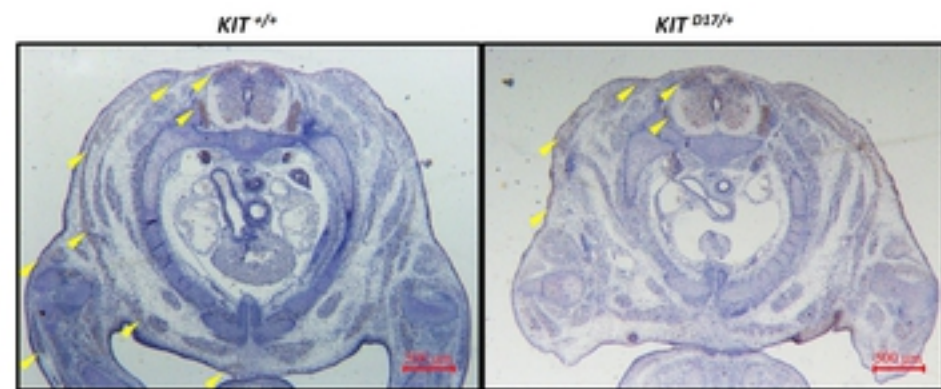

B

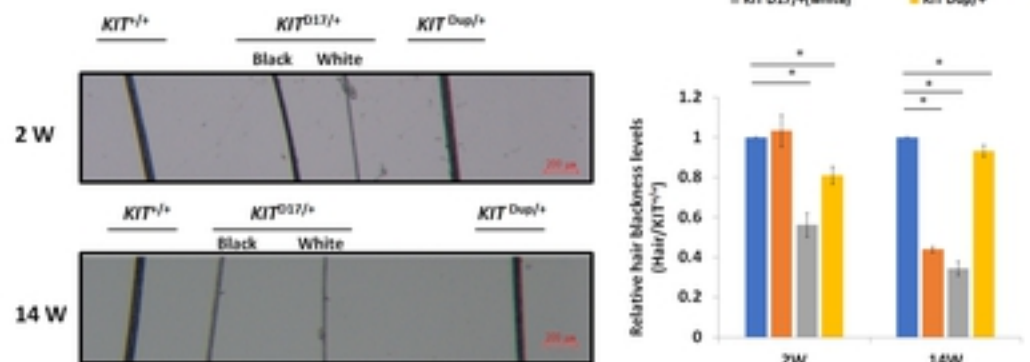

C

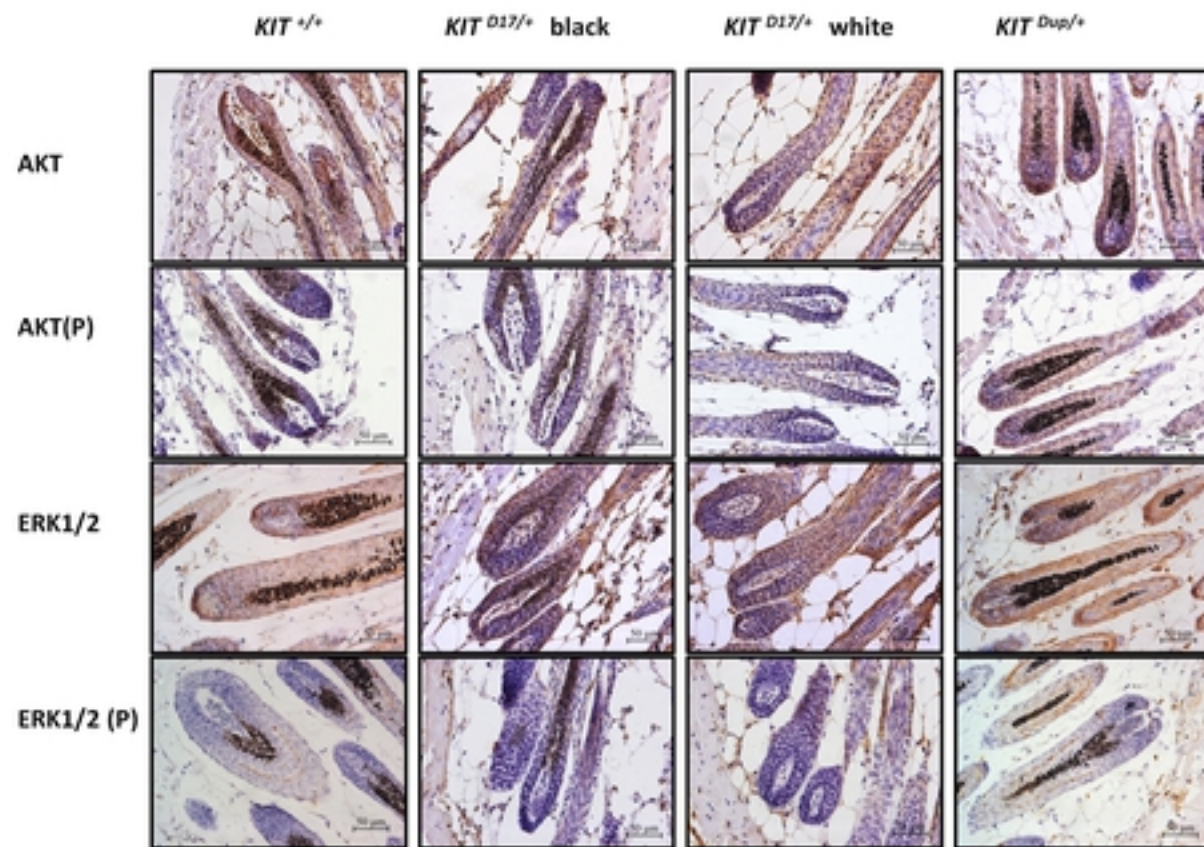

Figure 4

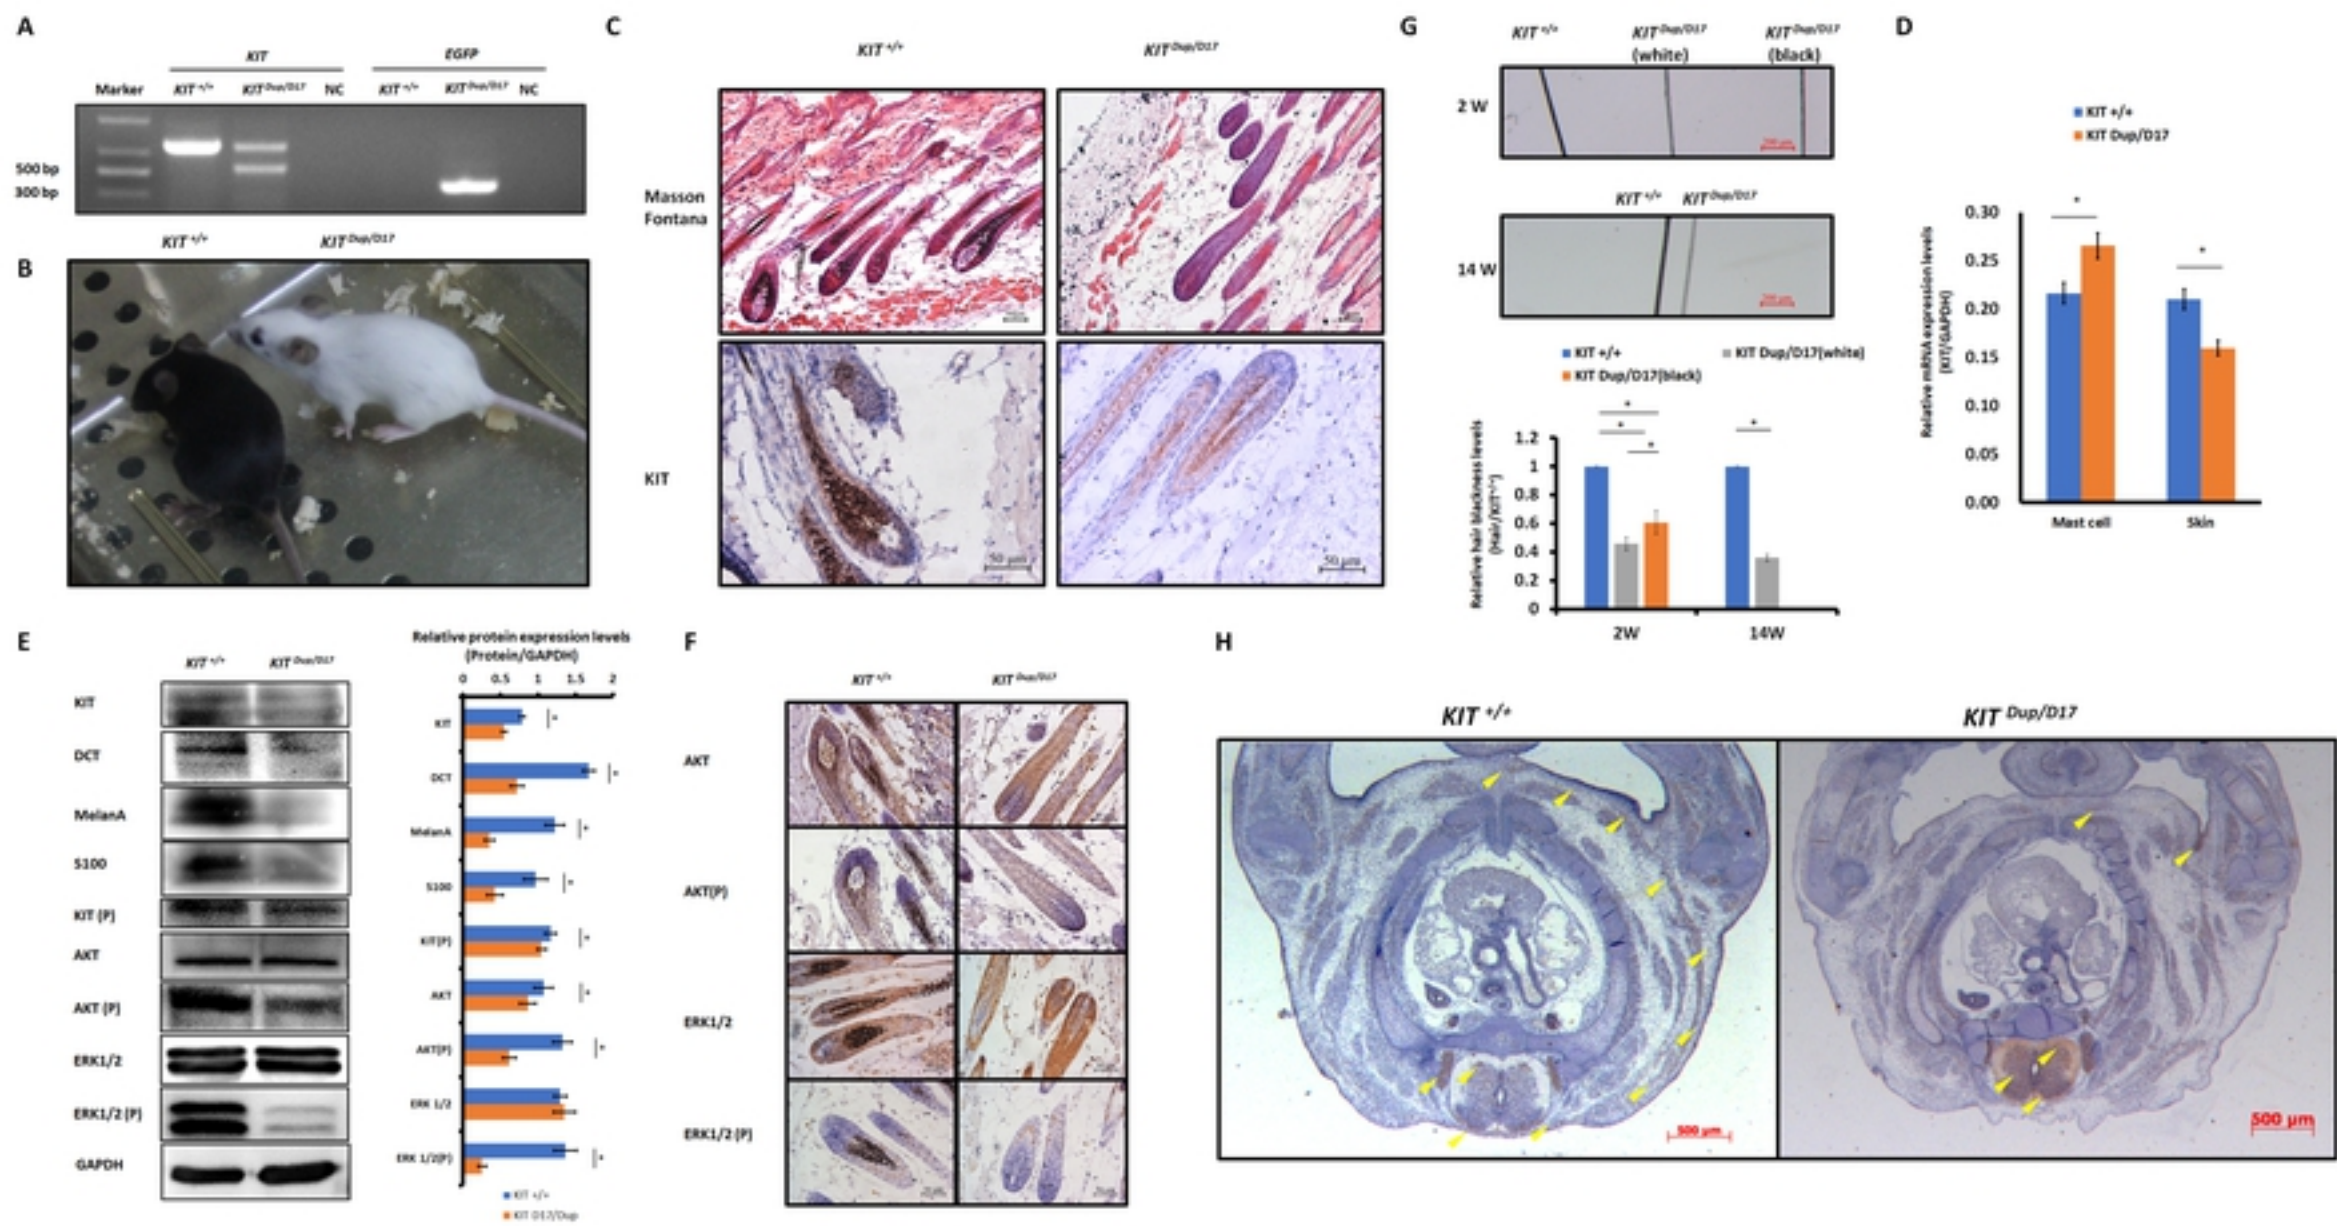



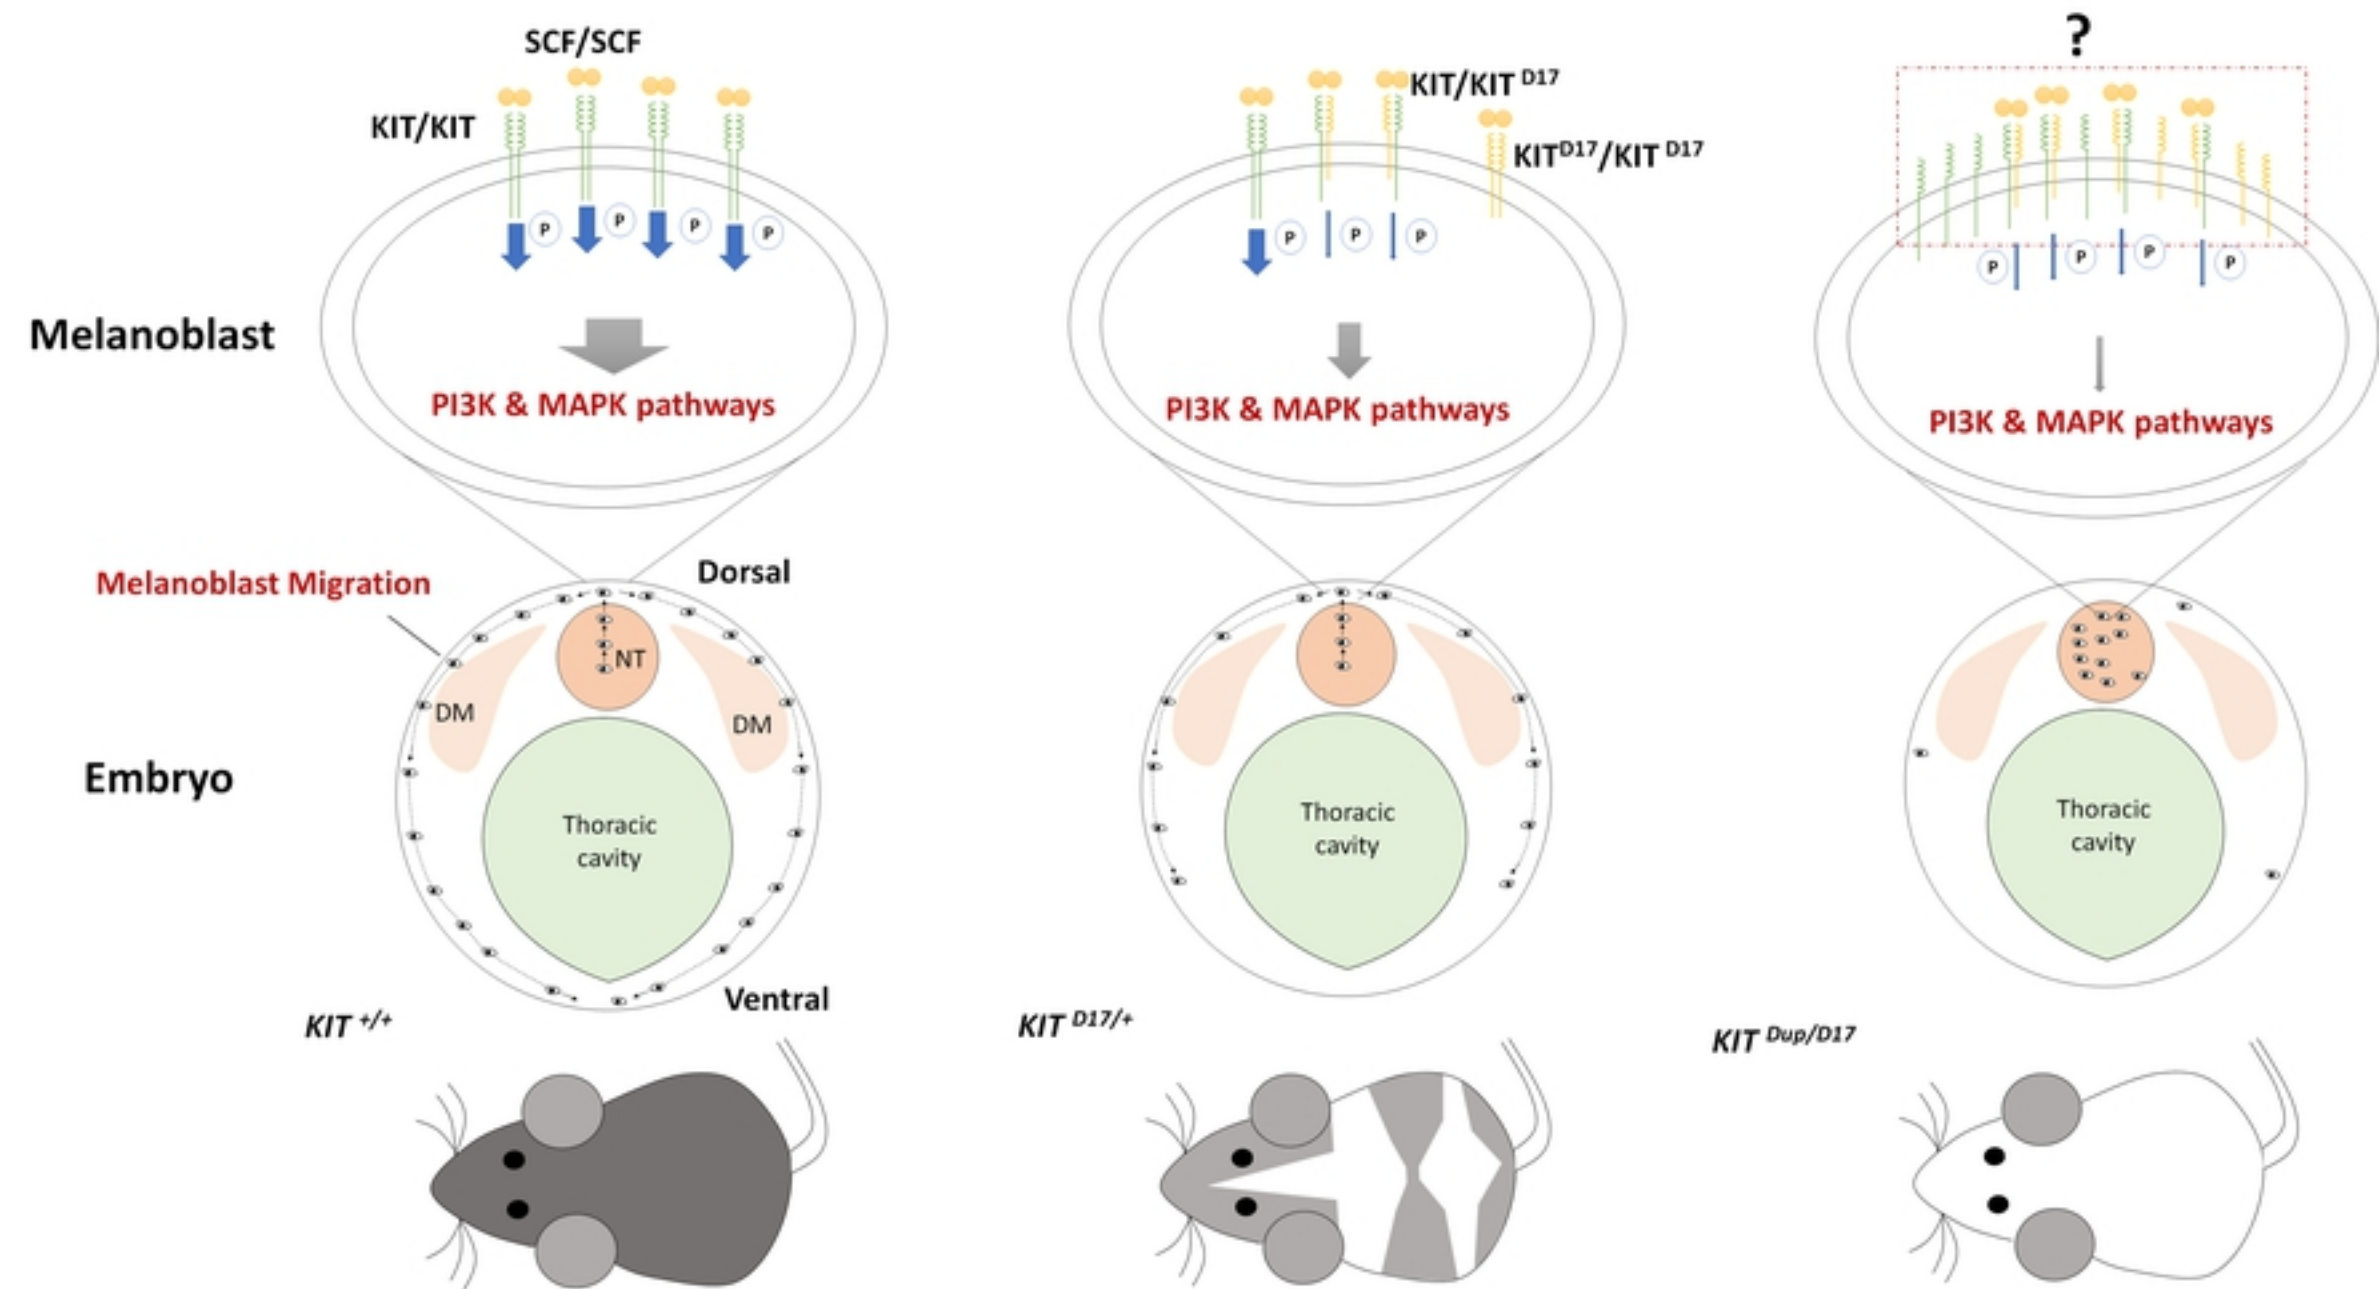

Figure 6
